# Supplementary material
Source: Springer Nature journal article supplement (https://www.springermedizin.de/resource/supplementary/12888_2013_1841_MOESM1_ESM.pdf/9481460)
Supplement: MOESM1 [file 9481460]

Studies from  
electronic databases  
and reference lists  
N=215

Excluded studies  
N=157

Included articles  
N=58

Review/commentary/  
case reports  
N=82

Comparison study  
with other epilepsy  
types N=6

Papers not  
available in  
English N=25

No rates given  
N=30

Referred to same  
study N=2

Methodological  
problems N=12

**Note-overlap  
reasons with  
some papers for  
excluded studies**
